# Supplementary material for: Polyethylene Glycol Priming Enhances the Seed Germination and Seedling Growth of Scutellaria baicalensis Georgi under Salt Stress
Source: MDPI journal article supplement (doi:10.3390/plants13050565), 2024-02-20
Supplement: s1 [file s1]

**Table S1.** Primers used for qRT-PCR analysis.

| Gene           | Primer Sequence          |                           |
|----------------|--------------------------|---------------------------|
|                | Forward(5'-3')           | Reverse(5'-3')            |
| <i>SbSOD1</i>  | AGTCCTCCCTTTTCGTTCC      | ACCGTTCTGGGTTTGTG         |
| <i>SbSOD2</i>  | CTCACCCAGGAGGACGAT       | GCAACTATGTTTCCCAGGTC      |
| <i>SbAPX</i>   | TACGCCAAGAGGATAGCA       | GGTAAATCGTCTGGGAAG        |
| <i>SbPOD1</i>  | TCAAACCTACCACCACCT       | GTATGCCAAATCCAGAGT        |
| <i>SbPOD2</i>  | GGACTGTAAGGCTGGGAAGA     | GAATAATCAAGTGGTGCTAAA     |
| <i>SbPOD3</i>  | GCAGCCAACACCCAAATC       | GCACCTCGCCTGTCCTAT        |
| <i>SbActin</i> | TTGATCTTGCTGGTCGTGATCTCA | TGTTTCTAGCTCTTGCTCGTAGTCG |
